# Supplementary material for: Statistical models versus machine learning for competing risks: development and validation of prognostic models
Source: Springer Nature journal article supplement (doi:10.1186/s12874-023-01866-z), 2023-02-24
Supplement: MOESM1 [file 24064222]

## Original eSTS data

| Characteristics            | Total (N = 3826) |
|----------------------------|------------------|
| Gender (%)                 |                  |
| Female                     | 1680 (43.91%)    |
| Male                       | 2011 (52.56%)    |
| Missing                    | 135 (3.53%)      |
| Mean age in years (sd)     | 59.40 (18.10)    |
| Mean tumor size in cm (sd) | 9.04 (5.77)      |
| Surgical margin (%)        |                  |
| $R_0$                      | 3028 (79.14%)    |
| $R_{1-2}$                  | 515 (13.46%)     |
| Missing                    | 283 (7.40%)      |
| Adjuvant chemotherapy (%)  |                  |
| No                         | 3189 (83.35%)    |
| Yes                        | 470 (12.28%)     |
| Missing                    | 167 (4.36%)      |
| Tumor grade (%)            |                  |
| II                         | 639 (16.70%)     |
| III                        | 3111 (81.31%)    |
| Missing                    | 76 (1.99%)       |
| Histological subtype (%)   |                  |
| Myxofibrosarcoma           | 689 (18.01%)     |
| Synovial sarcoma           | 411 (10.74%)     |
| MFH/UPS/NOS                | 1204 (31.47%)    |
| Leiomyosarcoma             | 368 (9.62%)      |
| Liposarcoma                | 388 (10.14%)     |
| Other                      | 452 (11.81%)     |
| Missing                    | 314 (8.21%)      |
| Tumor depth (%)            |                  |
| Superficial                | 912 (23.84%)     |
| Deep                       | 2493 (65.16%)    |
| Missing                    | 421 (11.00%)     |
| Radiotherapy (%)           |                  |
| No                         | 1331 (34.79%)    |
| Neoadjuvant                | 517 (13.51%)     |
| Adjuvant                   | 1878 (49.09%)    |
| Missing                    | 100 (2.61%)      |

Table S1: **Patient demographics before the imputation.** sd, standard deviation;  $R_0$ , negative margin;  $R_{1-2}$ , positive margin with tumor cells in the inked surface of the resection margin; MFH/UPS/NOS, alignant fibrous histiocytoma / undifferentiated pleomorphic sarcoma / (pleomorphic) soft tissue sarcomas not-otherwise-specified; histology "Other", angiosarcoma, clear cell sarcoma, conventional fibrosarcoma, epithelioid sarcoma, giant cell sarcoma, malignant granular cell tumor, malignant peripheral nerve sheath tumor, rhabdomyosarcoma (adult form), spindle cell sarcoma, unclassified soft tissue sarcoma and undifferentiated sarcoma.
